# Supplementary material for: Green synthesis of α-amino acids by electrochemical carboxylation of imines in a flow microreactor
Source: Royal Society of Chemistry journal article supplement (doi:10.1039/c7re00149e), 2017-01-01
Supplement: c7re00149e1.pdf [file c7re00149e1.pdf]

Electronic Supplementary Information for

**Green synthesis of  $\alpha$ -amino acids by electrochemical carboxylation of imines  
in a flow microreactor**

Yang Qu<sup>a</sup>, Ciaki Tsuneishi<sup>a</sup>, Hiroyuki Tateno<sup>a</sup>, Yoshimasa Matsumura<sup>b</sup>, and Mahito Atobe<sup>a\*</sup>

<sup>a</sup>*Department of Environment and System Sciences, Yokohama National University, 79-7  
Tokiwadai, Hodogaya-ku, Yokohama 2408501, Japan*

<sup>b</sup>*Department of Chemistry and Chemical Engineering, Faculty of Engineering, Yamagata  
University, Jonan 4-3-16, Yonezawa, Yamagata, 992-8510, Japan*

\*To whom the correspondence should be addressed.

E-mail: atobe@ynu.ac.jp

Contents:

1. Linear Sweep Voltammograms
2. Determination of <sup>1</sup>H NMR Yields

## 1. Linear Sweep Voltammograms

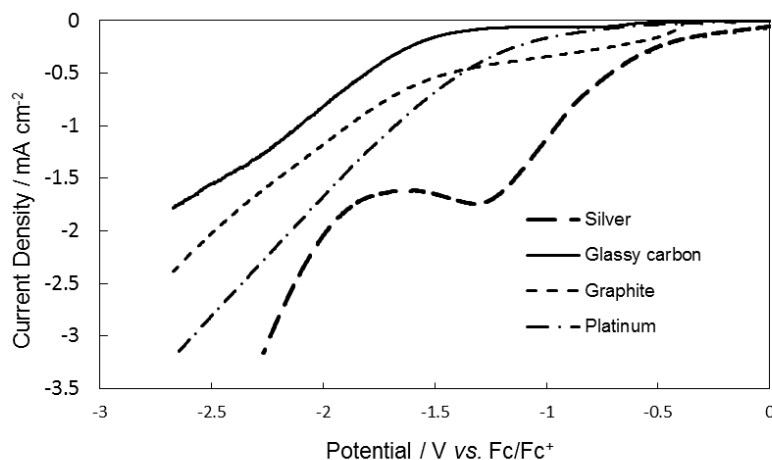

**Fig. S1** Linear sweep voltammograms of the saturated CO<sub>2</sub> in 0.1 M Bu<sub>4</sub>NBF<sub>4</sub>/THF at various disk electrodes at 0.1 V s<sup>-1</sup> in the scan rate at 25 ± 2 °C.

## 2. Determination of <sup>1</sup>H NMR Yields

After the electrolyses of imines **3-6**, 0.15 mL of their reaction mixtures were extracted with diethyl ether. Then, nitromethane (0.30 μL, 0.0056 mmol) as an internal standard was added to the evaporated residues. The yields of **3a-6a** were calculated by <sup>1</sup>H NMR measurements of these reaction mixtures with nitromethane (at 4.42 ppm) as an internal standard. Characteristic peaks of purpose products were determined by referring to the previous synthetic report [1].

The NMR yields of **3a-6a** were determined by following equation (2).

$$I_1 / 3N_1 = I_2 / N_2 \quad (1)$$

$$\text{Yield (\%)} = N_2 / N_{\text{imine}} \cdot 100\% \quad (2)$$

where  $I_1$  and  $I_2$  are NMR integral values of nitromethane and product peaks, respectively;  $N_1$  and  $N_2$  are mole quantities of nitromethane and product in <sup>1</sup>H NMR, respectively.

However, the amino acids **3a** and **4a** were not detected at all in the corresponding <sup>1</sup>H NMR spectra. On the other hand, as shown in Figs. **S2** and **S3**, the amino acids **5a** and **6a** were detected in the corresponding <sup>1</sup>H NMR spectra, and their yields were calculated from  $I_1$  and  $I_2$  values shown in Table S2.

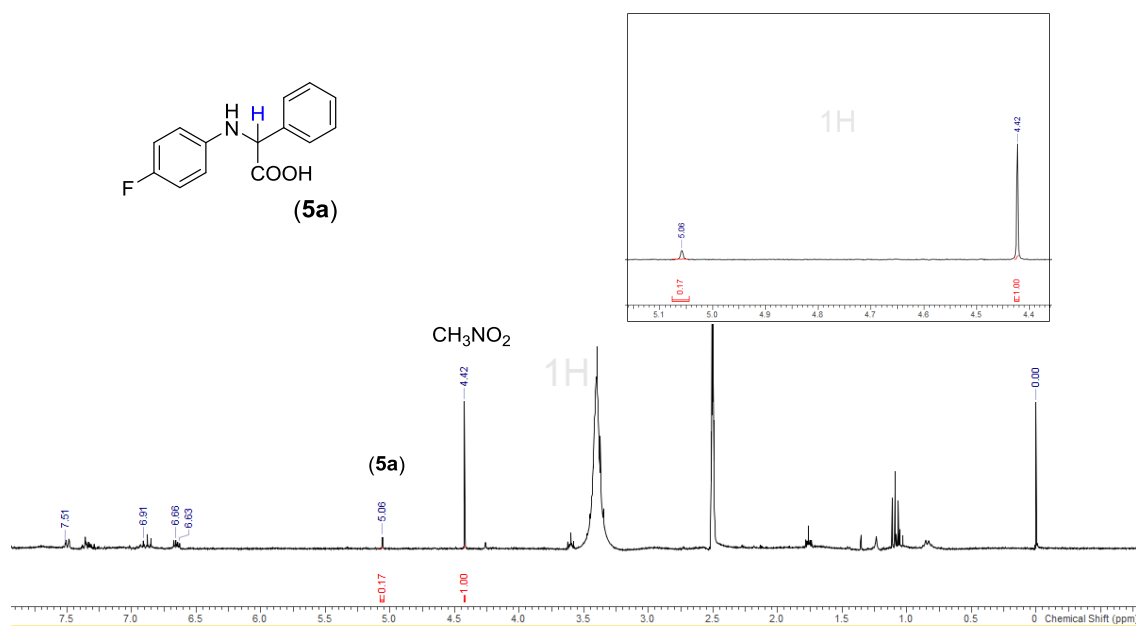

**Fig. S2** <sup>1</sup>H NMR spectrum of reaction mixture after the electrochemical carboxylation of imine **5** for synthesis of **5a**.

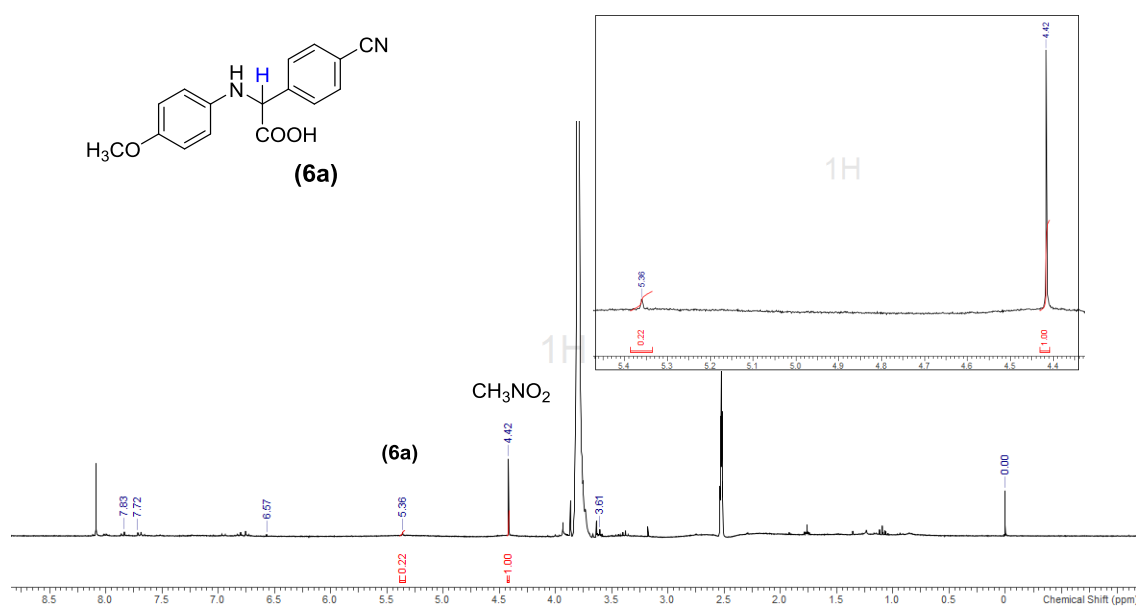

**Fig. S3** <sup>1</sup>H NMR spectrum of reaction mixture after the electrochemical carboxylation of imine **6** for synthesis of **6a**.

**Table S1** The  $I_1$  and  $I_2$  values for  $^1\text{H}$  NMR yields determination

| Amino acid                                                                                     | $I_1$ | $I_2$ | Yield (%) |
|------------------------------------------------------------------------------------------------|-------|-------|-----------|
| 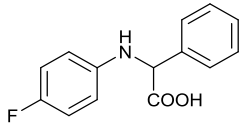<br><b>5a</b> | 1     | 0.17  | 32        |
| <br><b>6a</b> | 1     | 0.22  | 41        |

Reference

1. A. A. Sathe, D. R. Hartline and A. T. Radosevich, *Chem. Commun.*, 2013, **49**, 5040.
